# Supplementary material for: A comprehensive classification and nomenclature of carboxyl–carboxyl(ate) supramolecular motifs and related catemers: implications for biomolecular systems
Source: PubMed Central journal article supplement (PMC4383392; doi:10.1107/s205252061500270x), 2015-03-24
Supplement: b-71-00164-sup1.pdf [file b-71-00164-sup1.pdf]

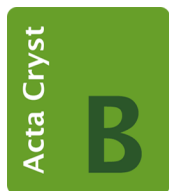

STRUCTURAL SCIENCE  
CRYSTAL ENGINEERING  
MATERIALS

**Volume 71 (2015)**

**Supporting information for article:**

**A comprehensive classification and nomenclature of carboxyl–  
carboxyl(ate) supramolecular motifs and related catemers:  
implications for biomolecular systems**

**Luigi D'Ascenzo and Pascal Auffinger**

**Table S1** List of all catemer-containing structures identified in the CSD with  $R1 \leq 0.05$ .

---

|                       |                                                                                                                                                                                                                                                                                                                                                                                                                                                                                                                                                                                                           |
|-----------------------|-----------------------------------------------------------------------------------------------------------------------------------------------------------------------------------------------------------------------------------------------------------------------------------------------------------------------------------------------------------------------------------------------------------------------------------------------------------------------------------------------------------------------------------------------------------------------------------------------------------|
| <i>Homo-catemer</i>   |                                                                                                                                                                                                                                                                                                                                                                                                                                                                                                                                                                                                           |
| SS-S                  | DAYNUN; ENIFAJ; FIKJEO; GUWCOQ; HUKJUT; HUSXAU; IBUHES; IBUHOC;<br>MUCQAD; NAGVUM; SUVYEN; TARTAC; TARTAL; TARTAL01; TARTAL02;<br>TARTAL03; TARTAL04; TORTEA; VAFCUB; WOCHIF; XEDZUC; XONNET;<br>ZOGTUK                                                                                                                                                                                                                                                                                                                                                                                                   |
| SA-S                  | ACETAC07; ACETAC09; ARUVAK; BELQOZ; BIPCIQ10; BUJYEL; CANSAL;<br>CIJLOW; CIPZIL; CITRAC10; CITRAC11; CLACET01; DIYDIY; DMCPCX;<br>DOTWOY; EVORIQ; EYONAI; FIWQEI; FOHREI; FORMAC01; GELZIG;<br>GOGPEY; GOGPIC; HEKWOJ; HIFWOJ; HUGSEH; HUWLIV; IMEHIS; IROQOV;<br>ISORUD; ISOSAK; ISOSAL; IVEBIV; JUMVIW; KABGOL; KIKLIZ; KOJZEO;<br>KUTMIW; MEKMOF; MIYCON; MEDNOZ01; NUFJUU; OWUSEF; OXALAC05;<br>OXALAC07; PEPPAD; PEZWAS; QAGMOG; QUQHAL; QURQID; RACCEE;<br>SAWBUN; SDPPCX; TEHMAU; TETROL01; TUSPOM; UCAYUU; URUPUT;<br>VEVSIZ; VOHNUC; WANROU; WASJAD01; WINVAR; WOCTUD; WUXHUS;<br>ZAVTOF; ZILBOL |
| AS-A                  | GIMRAW; NEWXAO; ROGHOL                                                                                                                                                                                                                                                                                                                                                                                                                                                                                                                                                                                    |
| AA-A                  | DMOXDA01; DMOXDA02; HUMGOL                                                                                                                                                                                                                                                                                                                                                                                                                                                                                                                                                                                |
| <i>Hetero-catemer</i> |                                                                                                                                                                                                                                                                                                                                                                                                                                                                                                                                                                                                           |
| SS-A•AS-S             | ROZHEU                                                                                                                                                                                                                                                                                                                                                                                                                                                                                                                                                                                                    |
| SS-A•AA-S             | BCOCD; CBUDCX; CBUDCX01; CBUDCX02; CBUDCX03; CBUDCX04;<br>COMHFN; COMHFN01; CPRDCA; FIGMAJ; FURDCB01; IDAKAB; JUNCUQ;<br>JUNMAG; MEKLOE; MIGPEX; RAJJUH                                                                                                                                                                                                                                                                                                                                                                                                                                                   |
| SA-A•AS-S             | WOKPOC                                                                                                                                                                                                                                                                                                                                                                                                                                                                                                                                                                                                    |
| SA-A•AA-S             | CPIBFC; CUKGIZ; KAMKAK; KAKTOS; MALIAC11; MALIAC12; MALIAC13                                                                                                                                                                                                                                                                                                                                                                                                                                                                                                                                              |

---
